# Supplementary material
Source: PubMed Central journal article supplement (PMC503738)
Supplement: pnas_101_30_11040__4.pdf [file pnas_101_30_11040__4.pdf]

**Table 3.** Taxon sampling, specimen information, and GenBank accession numbers for sequences

| Sibley and Monroe (1) taxonomy |                                                     |                                       |                   | GenBank accession nos.                     |                                                   |                                                      |          |                           |          |
|--------------------------------|-----------------------------------------------------|---------------------------------------|-------------------|--------------------------------------------|---------------------------------------------------|------------------------------------------------------|----------|---------------------------|----------|
| Suborder                       | Parvorder                                           | Superfamily                           | Family            | Representative taxa <sup>a</sup>           | Specimen data <sup>a</sup>                        | RAG-1                                                | RAG-2    | Cytochrome b <sup>b</sup> |          |
| Tyranni                        |                                                     |                                       | Acanthisittidae   | <i>Acanthisitta chloris</i>                | Unvouchered (RIF002), <i>vide</i> A.J. Baker, ROM | AY056975                                             |          |                           |          |
|                                |                                                     |                                       |                   | <i>Acanthisitta chloris</i>                | Unvouchered (RIF001), <i>vide</i> A.J. Baker, ROM |                                                      | AY443102 |                           |          |
|                                |                                                     |                                       | Pittidae          | <i>Pitta sordida</i>                       | AMNH (PRS712)                                     | AY443319                                             | AY443206 |                           |          |
|                                |                                                     |                                       | Eurylaimidae      | <i>Smithornis rufolateralis</i>            | AMNH 827484 (CGS5226)                             | AY057031                                             | AY443228 |                           |          |
|                                |                                                     |                                       |                   | <i>Psarisomus dalhousiae</i>               | AMNH 22993 (PRS629)                               | AY057025                                             | AY443214 |                           |          |
|                                |                                                     |                                       | Philepittidae     | <b><i>Philepitta castanea</i></b>          | FMNH 345690                                       | AY057018                                             | AY443201 |                           |          |
|                                |                                                     |                                       |                   | <b><i>Neodrepanis coruscans</i></b>        | FMNH 393232                                       | AY443306                                             | AY443181 |                           |          |
|                                |                                                     |                                       | Tyrannidae        | <i>Mionectes [Pipromorpha] macconnelli</i> | AMNH (GFB2886)                                    | AY443302                                             | AY443174 |                           |          |
|                                |                                                     |                                       |                   | <i>Tyrannus tyrannus</i>                   | AMNH 24560 (PRS1298)                              | AF143739                                             | AY443243 |                           |          |
|                                |                                                     |                                       |                   | <i>Schiffornis turdinus</i>                | AMNH (GFB2223)                                    | AY443330                                             | AY443225 |                           |          |
|                                |                                                     |                                       |                   | <i>Tityra semifasciata</i>                 | AMNH (GFB1035)                                    | AY443337                                             | AY443237 |                           |          |
|                                |                                                     |                                       |                   | <i>Rupicola rupicola</i>                   | AMNH 22747 (PRS802)                               | AY057029                                             | AY443224 |                           |          |
|                                |                                                     |                                       |                   | <i>Pipra coronata</i>                      | AMNH 9360 (SC804)                                 | AY057020                                             | AY443204 |                           |          |
|                                |                                                     |                                       | Thamnophilidae    | <i>Thamnophilus nigrocinereus</i>          | AMNH 18074 (GFB2200), Deaccessioned               | AY057034                                             | AY443235 |                           |          |
|                                |                                                     |                                       | Furnariidae       | <i>Furnarius rufus</i>                     | AMNH NA (PRS1836)                                 | AY056995                                             | AY443149 |                           |          |
|                                |                                                     |                                       |                   | <i>Campylorhamphus trochilirostris</i>     | AMNH (ALP145)                                     | AY443264                                             | AY443112 |                           |          |
|                                |                                                     |                                       |                   | <i>Formicarius colma</i>                   | AMNH 9343 (SC721)                                 | AY056993                                             | AY443147 |                           |          |
|                                |                                                     |                                       | Formicariidae     | <i>Conopophaga ardesiaca</i>               | AMNH (MV25)                                       | AY443271                                             | AY443125 |                           |          |
|                                |                                                     |                                       | Rhinocryptidae    | <i>Scytalopus magellanicus</i>             | AMNH (RTC449)                                     | AY443331                                             | AY443226 |                           |          |
|                                |                                                     |                                       | Climacteridae     | <i>Cormobates leucophaea</i>               | ANWC 49979                                        | AY443274                                             | AY443130 | AY064278 [placens ]       |          |
|                                |                                                     |                                       |                   | <i>Climacteris erythropus</i>              | UWBM 57635                                        | AY443268                                             | AY443121 | U58501 [rufus ]           |          |
|                                |                                                     |                                       |                   | <i>Climacteris picumna</i>                 | UWBM 57695 (SVE1092)                              | AY056987                                             | AY443122 |                           |          |
|                                |                                                     |                                       | Menuridae         | <i>Menura novaehollandiae</i>              | ANWC 43660                                        | AY057004                                             | AY443171 |                           |          |
|                                |                                                     |                                       | Ptilonorhynchidae | <i>Aluroedus melanotis</i>                 | BPBM 110138                                       | AY443260                                             | AY443105 | X74257                    |          |
|                                |                                                     |                                       |                   | <i>Ptilonorhynchus violaceus</i>           | Unvouchered (QM, Lab 3119)                        | AY057026                                             | AY443216 | X74256                    |          |
|                                |                                                     |                                       | Meliphagoidea     | Maluridae                                  | <i>Malurus melanocephalus</i>                     | Unvouchered (AM, Lab 1109), <i>in litt.</i> W. Boles | AY057001 | AY443162                  |          |
|                                |                                                     |                                       |                   | Meliphagidae                               | <i>Meliphaga analoga</i>                          | KUMNH 5171 (AM983), unvouchered <i>vide</i> A. Mack  | AY057003 | AY443170                  |          |
|                                |                                                     |                                       |                   |                                            | <i>Ephthianura tricolor</i>                       | UWBM 57574                                           | AY443285 | AY443144                  |          |
|                                |                                                     |                                       |                   | Pardalotidae                               | <i>Pardalotus punctatus</i>                       | AM [Lab 1141]                                        | AY443313 | AY443193                  |          |
|                                |                                                     |                                       |                   |                                            | <i>Pardalotus striatus</i>                        | AM [Lab 1062]                                        | AY057015 | AY443194                  |          |
|                                |                                                     |                                       | Corvoidea         | Petroicidae                                | <i>Microeca papuana</i>                           | KUMNH 5225 (AM1089)                                  | AY443301 | AY443172                  |          |
|                                |                                                     |                                       |                   |                                            | <b><i>Eugerygone rubra</i></b>                    | KUMNH 5246 (AM1114)                                  | AY443286 | AY443145                  |          |
|                                |                                                     |                                       |                   |                                            | <b><i>Melanodryas [Petroica] cucullata</i></b>    | UWBM 60860                                           | AY443300 | AY443169                  |          |
|                                |                                                     |                                       |                   |                                            | <i>Tregellasia leucops</i>                        | KUMNH 4701 (AM819), voucher BPBM                     | AY057037 | AY443239                  | AY443259 |
|                                |                                                     |                                       |                   |                                            | <b><i>Peneothello bimaculatus</i></b>             | KUMNH 5151 (AM962)                                   | AY443315 | AY443199                  | AY443256 |
|                                |                                                     |                                       |                   |                                            | <b><i>Pachycephalopsis poliosoma</i></b>          | KUMNH 4691 (AM803)                                   | AY443311 | AY443190                  |          |
|                                |                                                     |                                       | Irenidae          | <i>Irena cyanogaster</i>                   | FMNH 350955                                       | AY056999                                             | AY443158 |                           |          |
|                                |                                                     |                                       |                   | <i>Chloropsis cochinchinensis</i>          | AMNH 22997 DA-Singapore (PRS717)                  | AY056984                                             | AY443118 |                           |          |
|                                |                                                     |                                       | Orthonychidae     | <i>Orthonyx teminkii</i>                   | ANWC 46865                                        | AY443309                                             | AY443187 |                           |          |
|                                |                                                     |                                       |                   | <i>Orthonyx spaldingii</i>                 | ANWC 34489                                        | AY057012                                             | AY443186 |                           |          |
|                                |                                                     |                                       | Pomatostomidae    | <i>Pomatostomus isidorei</i>               | KUMNH 5099 (AM890), voucher BPBM                  | AY057023                                             | AY443210 |                           |          |
|                                |                                                     |                                       |                   | <i>Pomatostomus halli</i>                  | UWBM 57737                                        | AY443321                                             | AY443209 |                           |          |
|                                |                                                     |                                       | Laniidae          | <i>Lanius excubitor</i>                    | AMNH (LMC95-23)                                   | AY443293                                             | AY443160 |                           |          |
|                                |                                                     |                                       |                   | <i>Corvinella corvina</i>                  | LSUMNS B39326                                     | AY443275                                             | AY443131 |                           |          |
|                                |                                                     |                                       | Vireonidae        | <i>Vireo philadelphia</i>                  | AMNH 24546 (PRS1035)                              | AY057041                                             | AY443245 |                           |          |
|                                |                                                     |                                       |                   | <i>Hylophilus poicilotis</i>               | FMNH 395482                                       | AY443291                                             | AY443156 |                           |          |
|                                |                                                     |                                       | Corvidae          | <i>Ptiliorhoa caerulescens</i>             | KUMNH 5107 (AM899)                                | AY443326                                             | AY443218 |                           |          |
|                                | <i>Corcorax melanorhamphos</i>                      | AM [Lab 1146]                         | AY443273          | AY443129                                   | AY064274                                          |                                                      |          |                           |          |
|                                | <i>Struthidea cinerea</i>                           | AM [FB 40, SVE071]                    | AY443335          | AY443231                                   | AY064277                                          |                                                      |          |                           |          |
|                                | <i>Daphoenositta chrysoptera</i>                    | ANWC 43773                            | AY443281          | AY443138                                   |                                                   |                                                      |          |                           |          |
|                                | <i>Falcunculus frontatus</i>                        | AM [Lab 1150]                         | AY443287          | AY443146                                   |                                                   |                                                      |          |                           |          |
|                                | <i>Oreoica gutturalis</i>                           | ANWC 46761                            | AY443307          | AY443183                                   | AY443255                                          |                                                      |          |                           |          |
|                                | <i>Pachycephala hyperthra</i>                       | KUMNH 5123 (AM921)                    | AY443310          | AY443188                                   |                                                   |                                                      |          |                           |          |
|                                | <i>Pachycephala soror</i>                           | KUMNH 4692 (AM804), voucher BPBM      | AY057013          | AY443189                                   |                                                   |                                                      |          |                           |          |
|                                | <i>Colluricincla harmonica</i>                      | UWBM 57495                            | AY443270          | AY443124                                   |                                                   |                                                      |          |                           |          |
|                                | <i>Pitohui cristatus</i>                            | KUMNH 4697 (AM812)                    | AY443318          | AY443205                                   | AY443257                                          |                                                      |          |                           |          |
|                                | <i>Cyanocitta cristata</i>                          | Unvouchered (AMNH, JLC)               | AY443280          | AY443137                                   |                                                   |                                                      |          |                           |          |
|                                | <i>Corvus corone</i>                                | AMNH 24068 (PRS1288)                  | AY056989          | AY443132                                   | AF094613                                          |                                                      |          |                           |          |
|                                | <i>Corvus orru</i>                                  | AM [Lab 1163]                         | AY443277          | AY443134                                   |                                                   |                                                      |          |                           |          |
|                                | <i>Corvus coronoides</i>                            | AMNH (PRS2285)                        | AY443276          | AY443133                                   | AF197837                                          |                                                      |          |                           |          |
|                                | <i>Melampitta lugubris</i>                          | KUMNH 5257 (AM1126)                   | AY443298          | AY443166                                   | AY443253                                          |                                                      |          |                           |          |
|                                | <i>Melampitta gigantea</i>                          | SNZP, <i>vide</i> R. Fleischer        | AY443297          | AY443165                                   | AY443252                                          |                                                      |          |                           |          |
|                                | <b><i>Loboparadisea sericea</i></b>                 | KUMNH 4720 (AM843)                    | AY443294          | AY443161                                   | AF197843                                          |                                                      |          |                           |          |
|                                | <b><i>Cnemophilus loriae</i></b>                    | KUMNH 5220 (AM1083)                   | AY443269          | AY443123                                   | AF197841 [macgregorii ]                           |                                                      |          |                           |          |
|                                | <i>Manucodia atra</i>                               | KUMNH 5108 (AM900)                    | AY443295          | AY443163                                   | AY443250                                          |                                                      |          |                           |          |
|                                | <i>Manucodia chalybata</i>                          | KUMNH 5157 (AM968)                    | AY443296          | AY443164                                   | AY443251                                          |                                                      |          |                           |          |
|                                | <i>Ptiloris magnificus</i>                          | KUMNH 5212 (AM1031)                   | AY443325          | AY443217                                   | X74254                                            |                                                      |          |                           |          |
|                                | <i>Paradisaea raggiana</i>                          | ZSSD AO48924 (27731)                  | AY057014          | AY443191                                   | U25738, U15204                                    |                                                      |          |                           |          |
|                                | <i>Cracticus quoyi</i>                              | KUMNH 5084 (AM873)                    | AY443278          | AY443135                                   | AY443248                                          |                                                      |          |                           |          |
|                                | <i>Gymnorhina tibicen</i>                           | Unvouchered (AMNH, JLC)               | AY443289          | AY443153                                   | AF197867                                          |                                                      |          |                           |          |
|                                | <i>Strepera graculina</i>                           | UQ, <i>vide</i> L. Joseph             | AY443334          | AY443230                                   |                                                   |                                                      |          |                           |          |
|                                | <i>Artamus leucorhynchus</i>                        | FMNH 345096                           | AY056980          | AY443109                                   |                                                   |                                                      |          |                           |          |
|                                | <i>Artamus cyanopterus</i>                          | MV 00133                              | AY443262          | AY443108                                   |                                                   |                                                      |          |                           |          |
|                                | <i>Oriolus xanthonotus</i>                          | ANSP 1176                             | AY443308          | AY443185                                   |                                                   |                                                      |          |                           |          |
|                                | <i>Oriolus larvatus</i>                             | AMNH 25750 (JGG1280)                  | AY057011          | AY443184                                   |                                                   |                                                      |          |                           |          |
|                                | <i>Sphecotheres viridis</i>                         | AM [Lab 1189]                         | AY443333          | AY443229                                   |                                                   |                                                      |          |                           |          |
|                                | <i>Coracina novaehollandiae</i>                     | AM [Lab 1142]                         | AY443272          | AY443128                                   |                                                   |                                                      |          |                           |          |
|                                | <i>Coracina lineata</i>                             | AMNH 23412 (MKL64)                    | AY056988          | AY443127                                   |                                                   |                                                      |          |                           |          |
|                                | <i>Lalage leucomela</i>                             | UWBM 57518                            | AY443292          | AY443159                                   |                                                   |                                                      |          |                           |          |
|                                | <i>Pericrocotus ethologus</i>                       | FMNH 347842                           | AY443316          | AY443200                                   |                                                   |                                                      |          |                           |          |
|                                | <i>Rhipidura hyperthra</i>                          | KUMNH 5169 (AM981)                    | AY443329          | AY443223                                   |                                                   |                                                      |          |                           |          |
|                                | <i>Chaetorhynchus papuensis</i>                     | KUMNH 4690 (AM802)                    | AY443267          | AY443117                                   |                                                   |                                                      |          |                           |          |
|                                | <i>Dicrurus adsimilis</i>                           | AMNH 25749 (JGG1301)                  | AY056991          | AY443140                                   |                                                   |                                                      |          |                           |          |
|                                | <i>Dicrurus hottentottus</i>                        | KUMNH 5098 (AM889)                    | AY443283          | AY443141                                   |                                                   |                                                      |          |                           |          |
|                                | <b><i>Elminia [Trochocercus] nigromitratus</i></b>  | AMNH (PRS2106)                        | AY443338          | AY443240                                   | AF096474                                          |                                                      |          |                           |          |
|                                | <i>Monarcha axillaris</i>                           | KUMNH 4716 (AM838), voucher BPBM      | AY057006          | AY443176                                   |                                                   |                                                      |          |                           |          |
|                                | <i>Monarcha chrysomela</i>                          | KUMNH 5202 (AM1021)                   | AY443304          | AY443177                                   | AY443254                                          |                                                      |          |                           |          |
|                                | <i>Grallina cyanoleuca</i>                          | AM [Lab 1144]                         | AY443288          | AY443152                                   |                                                   |                                                      |          |                           |          |
|                                | <i>Grallina cyanoleuca</i>                          | AM [FB 1509 #15]                      |                   |                                            | AY443249                                          |                                                      |          |                           |          |
|                                | <i>Aegithina tiphia</i>                             | AMNH 22963 (PRS691)                   | AY056977          | AY443104                                   |                                                   |                                                      |          |                           |          |
|                                | <i>Dryoscopus cubla</i>                             | DM (D-9)                              | AY443284          | AY443142                                   |                                                   |                                                      |          |                           |          |
|                                | <i>Telophorus dohertyi</i>                          | FMNH 358004                           | AY443336          | AY443234                                   |                                                   |                                                      |          |                           |          |
|                                | <i>Prionops plumatus</i>                            | ZMUC (LPZ-089, tube 102)              | AY443322          | AY443211                                   |                                                   |                                                      |          |                           |          |
|                                | <i>Batis mixta</i>                                  | ZMUC (SMG-4619, tube 465)             | AY443263          | AY443110                                   |                                                   |                                                      |          |                           |          |
|                                | <b><i>Vanga curvirostris</i></b>                    | FMNH 352878                           | AY057040          | AY443244                                   |                                                   |                                                      |          |                           |          |
| Callaeatidae                   | <b><i>Philesturnus [Creaedion] carunculatus</i></b> | SNZP (1695), <i>vide</i> J. Dumbacher | AY443317          | AY443202                                   |                                                   |                                                      |          |                           |          |
| Picathartidae                  | <i>Chaetops frenatus</i>                            | PFI (PFI18421)                        | AY443266          | AY443116                                   |                                                   |                                                      |          |                           |          |

*incertae sedis*  
**Table 3.** continued.

| Sibley and Monroe (1) taxonomy |                       |             |               | GenBank accession nos.           |                                                  |                                  |          |                           |                         |
|--------------------------------|-----------------------|-------------|---------------|----------------------------------|--------------------------------------------------|----------------------------------|----------|---------------------------|-------------------------|
| Suborder                       | Parvorder             | Superfamily | Family        | Representative taxa <sup>1</sup> | Specimen data <sup>1</sup>                       | RAG-1                            | RAG-2    | Cytochrome b <sup>2</sup> |                         |
| Passeri                        | <i>incertae sedis</i> | Passerida   | Picathartidae | <i>Picathartes gymnocephalus</i> | AMNH 827716 (AC350)                              | AY057019                         | AY443203 |                           |                         |
|                                |                       |             | Bombycillidae | <i>Bombycilla garrulus</i>       | Unvouchered (AMNH, PRS1417)                      | AY056981                         | AY443111 | AF285796                  |                         |
|                                |                       |             |               | Muscicapoidea                    | <i>Ptilogonys cinereus</i>                       | FMNH (ATP6132)                   | AY443324 | AY443215                  | AY443258                |
|                                |                       |             |               | Cinclidae                        | <i>Cinclus cinclus</i>                           | AMNH NA (PRS2328)                | AY056985 | AY443119                  |                         |
|                                |                       |             |               | Muscicapidae                     | <i>Catharus ustulatus</i>                        | Unvouchered (AMNH, JLC)          | AY443265 | AY443114                  | AY049507                |
|                                |                       |             |               |                                  | <i>Turdus falcklandii</i>                        | AMNH NA (PRS1825)                | AY057039 | AY443242                  | AF197835 [migratorius ] |
|                                |                       |             |               |                                  | <i>Muscicapa ferruginea</i>                      | AMNH (PRS2233)                   | AY443305 | AY443179                  |                         |
|                                |                       |             |               |                                  | <b><i>Culicicapa ceylonensis</i></b>             | AMNH (JGG1172)                   | AY443279 | AY443136                  | AF096453                |
|                                |                       |             |               |                                  | <i>Sturnus vulgaris</i>                          | FMNH 389606 (MCP96-437)          | AY057032 | AY443232                  |                         |
|                                |                       |             |               |                                  | <i>Mimus patagonicus</i>                         | AMNH NA (PRS1711)                | AY057005 | AY443173                  |                         |
|                                |                       |             | Sylvioidea    | Sittidae                         | <i>Sitta carolinensis</i>                        | AMNH (MGL253)                    | AY443332 | AY443227                  |                         |
|                                |                       |             |               | Certhiidae                       | <i>Certhia familiaris</i>                        | FMNH 351158 (S87-0026)           | AY056983 | AY443115                  |                         |
|                                |                       |             |               |                                  | <i>Troglodytes aedon</i>                         | FMNH 343273 (MEX331)             | AY057038 | AY443241                  | AY352547                |
|                                |                       |             |               |                                  | <i>Poliophtila caerulea</i>                      | FMNH 343322 (MEX167)             | AY443320 | AY443208                  | AY352535                |
|                                |                       |             |               | Paridae                          | <i>Remiz pendulinus</i>                          | ZMUC 117640 (O1851)              | AY443328 | AY443222                  |                         |
|                                |                       |             |               |                                  | <i>Parus major</i>                               | AMNH (PRS2335)                   | AY443314 | AY443197                  | AF347962                |
|                                |                       |             |               |                                  | <i>Parus inornatus</i>                           | AMNH 23656 (PRS1015)             | AY057017 | AY443196                  | X60944                  |
|                                |                       |             |               | Aegithalidae                     | <i>Aegithalos iouschensis</i>                    | AMNH 831357 (JGG1052)            | AY056976 | AY443103                  |                         |
|                                |                       |             |               | Hirundinidae                     | <i>Hirundo rustica</i>                           | Unvouchered (AMNH, JLC)          | AY443290 | AY443155                  | AF074577                |
|                                |                       |             |               |                                  | <i>Hirundo pyrrhonota</i>                        | AMNH 23653 (PRS1013)             | AY056997 | AY443154                  | AF074591                |
|                                |                       |             |               | Regulidae                        | <i>Regulus calendula</i>                         | AMNH 24545 (PRS1080)             | AY057028 | AY443220                  | AJ004327                |
|                                |                       |             |               |                                  | <i>Regulus satrapa</i>                           | AMNH (GFB3235)                   | AY443327 | AY443221                  | AJ004329                |
|                                |                       |             |               | Pycnonotidae                     | <i>Pycnonotus barbatus</i>                       | AMNH 24822 (PRS2125)             | AY057027 | AY443219                  |                         |
|                                |                       |             |               | Cisticolidae                     | <i>Cisticola anonymus</i>                        | AMNH 832156 (PB159)              | AY056986 | AY443120                  |                         |
|                                |                       |             |               | Zosteropidae                     | <i>Zosterops senegalensis</i>                    | FMNH 346671 (JCK0607)            | AY057042 | AY443247                  | AY352549                |
|                                |                       |             |               | Sylviidae                        | <i>Garrulax milleti</i>                          | AMNH 833160 (PRS2191)            | AY056996 | AY443151                  |                         |
|                                |                       |             |               |                                  | <b><i>Modulatrix stictigula</i></b>              | ZMUC 118730 (O2941)              | AY443303 | AY443175                  |                         |
|                                |                       |             |               |                                  | <b><i>Arcanator orostruthus</i></b>              | ZMUC 118184 (OZ395)              | AY443261 | AY443107                  |                         |
|                                |                       |             |               |                                  | <b><i>Erpornis [Yuhina] zantholeuca</i></b>      | AMNH (PRS2248)                   | AY443339 | AY443246                  |                         |
|                                |                       |             |               |                                  | <i>Sylvia nana</i>                               | AMNH 23211 (LMC95-22)            | AY057033 | AY443233                  | Z73494 [atricapilla ]   |
|                                |                       |             | Passeroidea   | Alaudidae                        | <i>Alauda arvensis</i>                           | AMNH NA (PRS2316)                | AY056978 | AY443106                  |                         |
|                                |                       |             |               | Nectariniidae                    | <i>Promerops cafer</i>                           | PFI, <i>vide</i> T. Crowe        | AY443323 | AY443212                  |                         |
|                                |                       |             |               |                                  | <i>Dicaeum aeneum</i>                            | AMNH (MKL115)                    | AY443282 | AY443139                  |                         |
|                                |                       |             |               |                                  | <i>Nectarinia olivacea</i>                       | AMNH 831874 (RWD23779)           | AY057008 | AY443180                  |                         |
|                                |                       |             |               | Melanocharitidae                 | <i>Melanocharis nigra</i>                        | KUMNH 5153 (AM964), voucher BPBM | AY057002 | AY443167                  |                         |
|                                |                       |             |               |                                  | <i>Melanocharis versteri</i>                     | KUMNH 4708 (AM830)               | AY443299 | AY443168                  |                         |
|                                |                       |             |               |                                  | <i>Toxorhamphus novaeguineae</i>                 | KUMNH 5102 (AM894), voucher BPBM | AY057036 | AY443238                  |                         |
|                                |                       |             |               |                                  | <i>Oedistoma iliolophum</i>                      | KUMNH 5145 (AM956), voucher BPBM | AY057010 | AY443182                  |                         |
|                                |                       |             |               | Paromythidae                     | <i>Paromythia montium</i>                        | MV (FB15)                        | AY443312 | AY443192                  |                         |
|                                |                       |             |               | Passeridae                       | <i>Passer montanus</i>                           | AMNH 22967 (PRS697)              | AF143738 | AY443198                  |                         |
|                                |                       |             |               |                                  | <i>Motacilla cinerea</i>                         | UWBM 46534 (GAV158)              | AY057007 | AY443178                  |                         |
|                                |                       |             |               |                                  | <i>Prunella collaris</i>                         | AMNH 831301 (JGG1154)            | AY057024 | AY443213                  |                         |
|                                |                       |             |               |                                  | <i>Ploceus cucullatus</i>                        | AMNH 831877 (RWD23772)           | AY057022 | AY443207                  |                         |
|                                |                       |             |               | Fringillidae                     | <i>Fringilla montifringilla</i>                  | ROM (MKP1553)                    | AY056994 | AY443148                  |                         |
|                                |                       |             |               |                                  | <i>Emberiza schoeniclus</i>                      | MVZUC O480                       | AY056992 | AY443143                  |                         |
|                                |                       |             |               |                                  | <i>Parula americana</i>                          | Unvouchered (AMNH, PRS152)       | AY057016 | AY443195                  | AF256503                |
|                                |                       |             |               |                                  | <i>Thraupis cyanocephala</i>                     | AMNH 24097 (GFB3133)             | AY057035 | AY443236                  | AF489898 [bonariensis ] |
|                                |                       |             |               | <i>Cardinalis cardinalis</i>     | AMNH 23188 (PRS930)                              | AY056982                         | AY443113 | AF447363                  |                         |
|                                |                       |             |               | <i>Icterus parisorum</i>         | AMNH 832513 (JGG1243)                            | AY056998                         | AY443157 | AF089035                  |                         |
| Outgroups                      |                       |             | Coraciidae    | <i>Coracias caudata</i>          | AMNH 22703 (PRS756)                              | AF143737                         | AY443126 |                           |                         |
|                                |                       |             | Phasianidae   | <i>Gallus gallus</i>             | Unvouchered, <i>vide</i> M. Zuk, U. C. Riverside | AF143730                         | AY443150 |                           |                         |

<sup>1</sup>Passerine genera unsampled by Sibley and Ahlquist (2) are highlighted in bold.

<sup>2</sup>AM, Australian Museum, Sydney; AMNH, American Museum of Natural History, New York; BPBM, Bernice Parks Bishop Museum, Hawaii; ANWC, Australian National Wildlife Collection, Commonwealth Scientific and Industrial Research Organization; DM, Durban Museum; FMNH, Field Museum of Natural History, Chicago; KUMNH, University of Kansas, Museum of Natural History; MV, Museum Victoria, Melbourne; PFI, Percy Fitzpatrick Institute of Ornithology, University of Cape Town; SNZP, Smithsonian National Zoological Park; UQ, University of Queensland; QM, Queensland Museum, Brisbane; UWBM, Burke Museum, University of Washington, Seattle; ZMUC, Zoological Museum, University of Copenhagen; ZSSD, Zoological Society of San Diego; DA, deaccessioned; NA, not accessioned. Numbers in parentheses are collector's numbers. All KUMNH specimen numbers are tissue numbers. Australian Museum specimens with "Lab" or "FB" numbers in many cases lack vouchers (W. Boles, personal communication).

<sup>3</sup>In some cases, cytochrome b sequences from a different species within a genus were used in the mtDNA calibration analysis, and these are indicated in brackets.

- Sibley, C.G. & Monroe, B.L., Jr. (1990) *Distribution and Taxonomy of the Birds of the World* (Yale Univ. Press, New Haven, CT)
- Sibley, C.G. & Ahlquist, J.E. (1990) *Phylogeny and Classification of Birds: A Study in Molecular Evolution* (Yale Univ. Press, New Haven, CT).
