# Supplementary material
Source: PubMed Central journal article supplement (PMC503738)
Supplement: pnas_101_30_11040__5.pdf [file pnas_101_30_11040__5.pdf]

**Table 4.** Monophyly of and significance of paraphyly of groups present in Sibley and Ahlquist's (1) hypothesis of passerine relationships, including only genera sampled in common with the current study

| Node | Description                          | Taxon                    | Rank             | Monophyletic | Likelihood | Difference | P     |
|------|--------------------------------------|--------------------------|------------------|--------------|------------|------------|-------|
| 1    | Garrulax, Sylvia                     | Sylviidae                | Family           | No           | 53898.79   | 18.53      | 0.88  |
| 2    | 1, Zosterops                         |                          |                  | Yes          |            |            |       |
| 3    | 2, Cisticola                         |                          |                  | Yes          |            |            |       |
| 4    | 3, Pycnonotus                        |                          |                  | Yes          |            |            |       |
| 5    | 4, Regulus                           |                          |                  | No           | 53971.97   | 91.70      | 0.04  |
| 6    | 5, Hirundo                           |                          |                  | No           | 53974.74   | 94.48      | 0.04  |
| 7    | 6, Aegithalos                        |                          |                  | No           | 53935.08   | 54.82      | 0.26  |
| 8    | Parus, Remiz                         | Paridae                  | Family           | Yes          |            |            |       |
| 9    | 7, 8                                 |                          |                  | No           | 53940.80   | 60.53      | 0.20  |
| 10   | Poipitia, Troglodytes                |                          |                  | Yes          |            |            |       |
| 11   | 10, Certhia                          | Certhiidae               | Family           | No           | 53897.10   | 16.84      | 0.91  |
| 12   | 11, Sitta                            |                          |                  | Yes          |            |            |       |
| 13   | 9, 12                                | Sylviodea                | Superfamily      | No           | 53942.98   | 62.72      | 0.19  |
| 14   | Ploceus, Prunella                    |                          |                  | No           | 53901.96   | 21.70      | 0.83  |
| 15   | 14, Motacilla                        |                          |                  | No           | 53909.57   | 23.31      | 0.67  |
| 16   | 15, Passer                           | Passeridae               | Family           | No           | 53906.93   | 26.66      | 0.73  |
| 17   | Cardinalis, Icterus                  |                          |                  | No           | 53956.03   | 75.77      | 0.10  |
| 18   | 17, Thraupis                         |                          |                  | No           | 53931.97   | 51.70      | 0.31  |
| 19   | 18, Parula                           |                          |                  | No           | 53902.36   | 22.09      | 0.80  |
| 20   | 19, Emberiza                         | Emberizinae              | Subfamily        | Yes          |            |            |       |
| 21   | 20, Fringilla                        | Fringillidae             | Family           | Yes          |            |            |       |
| 22   | Dicaeum, Nectarinia                  | Nectariniinae            | Subfamily        | Yes          |            |            |       |
| 23   | 22, Promerops                        | Nectariniidae            | Family           | No           | 53903.40   | 23.13      | 0.80  |
| 24   | Oedistoma, Toxorhamphus              | Toxorhamphini            | Tribe            | Yes          |            |            |       |
| 25   | 24, Melanocharis                     | Melanocharitidae         | Family           | Yes          |            |            |       |
| 26   | 25, Paramythia                       |                          |                  | No           | 53926.75   | 46.48      | 0.38  |
| 27   | 23, 26                               |                          |                  | No           | 54050.19   | 169.92     | <0.01 |
| 28   | 21, 27                               |                          |                  | No           | 54185.99   | 305.73     | <0.01 |
| 29   | 16, 28                               |                          |                  | No           | 54070.52   | 190.25     | <0.01 |
| 30   | 29, Alauda                           | Passeroidea              | Superfamily      | No           | 54122.87   | 242.60     | <0.01 |
| 31   | 13, 30                               |                          |                  | No           | 54074.18   | 193.92     | <0.01 |
| 32   | Bombycilla, Ptilogonyx               | Bombycillidae            | Family           | Yes          |            |            |       |
| 33   | Catharus, Turdus                     | Turdinae                 | Subfamily        | Yes          |            |            |       |
| 34   | 33, Muscipapa                        | Muscicapidae             | Family           | Yes          |            |            |       |
| 35   | Mimus, Sturnus                       | Sturnidae                | Family           | Yes          |            |            |       |
| 36   | 34, 35                               |                          |                  | No           | 53899.15   | 18.88      | 0.86  |
| 37   | 36, Cinclus                          |                          |                  | Yes          |            |            |       |
| 38   | 32, 37                               | Muscicapodea             | Superfamily      | Yes          |            |            |       |
| 39   | 31, 38                               | Passerida                | Parvorder        | No           | 54046.29   | 166.02     | <0.01 |
| 40   | Chaetops, Picathartes                | Picathartidae            | Family           | Yes          |            |            |       |
| 41   | Alluroedus, Ptilonorhynchus          | Ptilonorhynchidae        | Family           | Yes          |            |            |       |
| 42   | 41, Menua                            |                          |                  | No           | 53936.31   | 56.05      | 0.26  |
| 43   | Climacteris, Cormobates              | Climacteridae            | Family           | Yes          |            |            |       |
| 44   | 42, 43                               | Menuroidea               | Superfamily      | No           | 53910.74   | 30.48      | 0.65  |
| 45   | Ephthianura, Meliphaga               | Meliphagidae             | Family           | Yes          |            |            |       |
| 46   | 45, Pardalotus                       |                          |                  | Yes          |            |            |       |
| 47   | 46, Malurus                          | Meliphagoidea            | Superfamily      | Yes          |            |            |       |
| 48   | Microeca, Tregellasia                | Petroicidae              | Family           | Yes          |            |            |       |
| 49   | Chloropsis, Irena                    | Irenidae                 | Family           | Yes          |            |            |       |
| 50   | Lanius, Corvinella                   | Laniidae                 | Family           | Yes          |            |            |       |
| 51   | Hylophilus, Vireo                    | Vireonidae               | Family           | Yes          |            |            |       |
| 52   | Corcorax, Struthidea                 | Corcoracinae             | Subfamily        | Yes          |            |            |       |
| 53   | Colluricincla, Pachycephala, Pitohui | Pachycephalini           | Tribe            | No           | 54009.62   | 129.35     | 0.01  |
| 54   | 53, Oreocia, Falco                   |                          |                  | No           | 53888.09   | 7.83       | 0.97  |
| 55   | 54, Daphoenositta                    | Pachycephalinae          | Subfamily        | No           | 53898.23   | 17.96      | 0.84  |
| 56   | Dryoscopus, Telophorus               | Malaconotini             | Tribe            | Yes          |            |            |       |
| 57   | Batis, Prionops                      | Vangini                  | Tribe            | No           | 53880.26   | 5.86       | 0.98  |
| 58   | 56, 57                               | Malaconotinae            | Subfamily        | No           | 53882.14   | 1.88       | 0.98  |
| 59   | 58, Aegithina                        |                          |                  | Yes          |            |            |       |
| 60   | Grallina, Monarcha                   | Monarchini               | Tribe            | Yes          |            |            |       |
| 61   | 60, Chaetorhynchus, Dicrurus         |                          |                  | No           | 53925.55   | 45.29      | 0.40  |
| 62   | 61, Rhipidura                        | Dicrurinae               | Subfamily        | No           | 53908.79   | 28.52      | 0.69  |
| 63   | 59, 62                               |                          |                  | No           | 54014.84   | 134.58     | 0.01  |
| 64   | Corvus, Cyanocitta                   | Corvini                  | Tribe            | Yes          |            |            |       |
| 65   | Paradisaea, Ptilons                  |                          |                  | Yes          |            |            |       |
| 66   | 65, Manucodia                        |                          |                  | Yes          |            |            |       |
| 67   | 66, Melampitta                       | Paradisaeini             | Tribe            | No           | 53893.77   | 13.50      | 0.95  |
| 68   | Coracina, Lalage                     |                          |                  | Yes          |            |            |       |
| 69   | 68, Pericrocotus                     |                          |                  | Yes          |            |            |       |
| 70   | Oniulus, Sphecotheres                |                          |                  | Yes          |            |            |       |
| 71   | 69, 70                               | Oriolini                 | Tribe            | No           | 53889.26   | 8.99       | 0.93  |
| 72   | Cracticus, Gymnorhina                |                          |                  | Yes          |            |            |       |
| 73   | 72, Strepera                         |                          |                  | Yes          |            |            |       |
| 74   | 73, Artamus                          | Artamini                 | Tribe            | Yes          |            |            |       |
| 75   | 71, 74                               |                          |                  | No           | 53953.17   | 72.91      | 0.13  |
| 76   | 67, 75                               |                          |                  | No           | 54044.63   | 164.37     | <0.01 |
| 77   | 64, 76                               | Corvinae                 | Subfamily        | No           | 54075.58   | 195.31     | <0.01 |
| 78   | 63, 77                               |                          |                  | No           | 53995.93   | 115.66     | 0.01  |
| 79   | 78, Pachycephalinae                  |                          |                  | No           | 54013.71   | 133.45     | <0.01 |
| 80   | 79, Corcoracinae                     |                          |                  | No           | 53964.92   | 84.66      | 0.06  |
| 81   | 80, Ptilorhoa (Cinclosomatinae)      | Corvidae                 | Family           | No           | 53972.14   | 91.88      | 0.03  |
| 82   | 81, Vireonidae                       |                          |                  | No           | 53968.31   | 88.05      | 0.05  |
| 83   | 82, Laniidae                         |                          |                  | No           | 53996.47   | 16.21      | 0.88  |
| 84   | 83, Pomatosomidae                    |                          |                  | No           | 53959.92   | 79.65      | 0.06  |
| 85   | 84, Orthonychidae                    |                          |                  | No           | 53952.53   | 72.27      | 0.12  |
| 86   | 85, Irenidae                         |                          |                  | No           | 54067.42   | 187.15     | <0.01 |
| 87   | 86, Petroicidae                      | Corvoidea                | Superfamily      | No           | 54066.54   | 186.28     | <0.01 |
| 88   | 47, 87                               |                          |                  | No           | 54100.17   | 219.91     | <0.01 |
| 89   | 44, 88                               | Corvida                  | Parvorder        | No           | 54179.99   | 299.73     | <0.01 |
| 90   | Corvida, Passerida                   | Passeri                  | Suborder         | Yes          |            |            |       |
| 91   | Campylorhamphus, Furnarius           | Furnariidae/Furnarioidea | Family/Parvorder | Yes          |            |            |       |
| 92   | Conopophaga, Scytalopus              |                          |                  | No           | 53912.61   | 32.34      | 0.61  |
| 93   | 92, Formicarius                      | Formicarioidea           | Superfamily      | No           | 53917.36   | 37.10      | 0.52  |
| 94   | 91, 93                               | Furnariida               | Parvorder        | Yes          |            |            |       |
| 95   | 94, Thamnophilus                     |                          |                  | Yes          |            |            |       |
| 96   | Pipra, Rupicola                      |                          |                  | No           | 53903.93   | 23.66      | 0.76  |
| 97   | Schiffornis, Tityra                  | Tityrinae                | Subfamily        | Yes          |            |            |       |
| 98   | 97, Tyrannus                         |                          |                  | No           | 53902.13   | 21.87      | 0.80  |
| 99   | 96, 98                               |                          |                  | No           | 53904.67   | 24.41      | 0.76  |
| 100  | 99, Mionectes                        | Tyrannidae/Tyrannida     | Family/Parvorder | Yes          |            |            |       |
| 101  | 93, 100                              | Tyrannides               | Infraorder       | Yes          |            |            |       |
| 102  | Psarisomus, Smithornis               | Eurylaimidae             | Family           | Yes          |            |            |       |
| 103  | 102, Pitta                           | Eurylaimides             | Infraorder       | Yes          |            |            |       |
| 104  | 101, 103                             |                          |                  | Yes          |            |            |       |
| 105  | 104, Acanthisitta                    | Tyranni                  | Suborder         | No           | 53908.38   | 28.12      | 0.70  |

The columns *Node* and *Description* can be used to reconstruct Sibley and Ahlquist's (1) tree for the genera shared with the current study. Groups which represent named higher taxa (1, 2) are indicated, as is their status on our preferred hypothesis of relationships (Figs. 1 and 3). For groups appearing paraphyletic in our analyses, the negative log-likelihood of the best tree consistent with the group, its difference from the best fit, and the significance of the difference (as indicated by the test of Shimodaira and Hasegawa, see *Methods* and ref. 3) are given.

1. Sibley, C.G. & Ahlquist, J.E. (1990) *Phylogeny and Classification of Birds: A Study in Molecular Evolution* (Yale Univ. Press, New Haven, CT).
2. Sibley, C.G. & Monroe, B.L., Jr. (1990) *Distribution and Taxonomy of the Birds of the World* (Yale Univ. Press, New Haven, CT)
3. Shimodaira, H. & Hasegawa, M. (1999) *Mol. Biol. Evol.* 16, 1114-1116.
