# Supplementary material
Source: PubMed Central journal article supplement (PMC503738)
Supplement: pnas_101_30_11040__6.pdf [file pnas_101_30_11040__6.pdf]

**Table 5.** An approximate timescale for important Late Cretaceous and Cenozoic geophysical and climatic events

| Event                                                               | Date       | Reference |
|---------------------------------------------------------------------|------------|-----------|
| New Zealand/West Antarctica separation                              | 85-82 Ma   | 10        |
| Australia/East Antarctica separation                                | 65-64 Ma   | 9         |
| End of North Atlantic connection between North America and Europe   | 55-53 Ma   | 7         |
| Collision of India with Eurasia                                     | 60-49 Ma   | 2         |
| End of terrestrial connections between South America and Antarctica | 40-30 Ma   | 1         |
| Major uplift of the Andes (southern)                                | 15 Ma      | 8         |
| Major uplift of the Andes (northern, central)                       | 10-0 Ma    | 4, 6      |
| Initiation of Miocene climatic deterioration                        | 13-12 Ma   | 11        |
| Opening of Panamanian isthmus                                       | 3.5-3.1 Ma | 3         |

1. Barker, P.F. (2001) *Earth-Science Rev.* **55**, 1-39.
2. Beck, R.A., Burbank, D.W., Sercombe, W.J., Riley, G.W., Barndt, J.K., Berry, J.R., Afzal, J., Khan, A.M., Jurgen, H., Metje, J. *et al.* (1995) *Nature* **373**, 55-58.
3. Coates, A.G. & Obando, J.A. (1996) *Evolution and environment in Tropical America*, eds. Jackson, J.B.C., Budd, A.F., & Coates, A.G., Univ. Chicago Press, Chicago; pp. 21-56.
4. Gregory-Wodzicki, K. M. (2000) *Bull. Geol. Soc. Am.* **112**, 1091-1105.
5. Gregory-Wodzicki, K. M. (2002) *Paleogeog. Palaeoclim. Palaeoecol.* **180**, 331-348.
6. Hartley, A.J. (2003) *J. Geol. Soc.* **160**, 7-10.
7. Mosar, J., Lewis, G., & Torsvik, T.H. (2002) *J. Geol. Soc.* **159**:503-515.
8. Vandervoort, D.S., Jordan, T.E., Zeitler, P.K., & Alonso, R.N. (1995) *Geology* **23**, 145-148.
9. Woodburne, M.O. & Case, J.A. (1996) *J. Mamm. Evol.* **3**, 121-161.
10. Yan, C.Y. & Kroenke, L.W. (1993) *Proc. Ocean Drill. Prog. Sci. Res.* **130**, 697-709.
11. Zachos, J.,M., Pagani, L., Sloan, E., Thomas, & Billups, K. (2001) *Science* **292**, 686-693.
