# Supplementary material
Source: PubMed Central journal article supplement (PMC503738)
Supplement: pnas_101_30_11040__7.pdf [file pnas_101_30_11040__7.pdf]

**Table 6.** Location and sequence of RAG-2 specific primers used

| Direction | Name         | Sequence                              | Position |
|-----------|--------------|---------------------------------------|----------|
| Forward   | <b>R2F4</b>  | GGTTCTTCCCTGCTGAATTTTGATGG            | 77       |
| Forward   | <b>R2-1</b>  | TCTTTTTTGGGCAGAAGGGATG                | 107      |
| Forward   | R2F1         | CAGAAGGGATGGCCGAAGAGATCCTG            | 122      |
| Forward   | R2-27        | AGAGGCAATGCAGAGTCTGA                  | 260      |
| Forward   | <b>R2-11</b> | GATGTCCCTGAAGCTAGATA                  | 413      |
| Forward   | <b>R2K1</b>  | GCTCAAGATGGACTTTCTTTCCA               | 620      |
| Forward   | R2F2         | CAGGATGGACTTTCCTTCCATGT               | 623      |
| Forward   | <b>R2-31</b> | GGGATATCTGTGTCAAGTGCT                 | 783      |
| Reverse   | R2-8         | TCATTGTTAGGKGTTCCTCCAC                | 284      |
| Reverse   | <b>R2-22</b> | ACGCTCATGCTTTTTCCC                    | 286      |
| Reverse   | R2-10        | CTGGCAACTGAAACATGGA                   | 617      |
| Reverse   | R2R2         | CGACACAGATATTCCTCCTGGCAA              | 754      |
| Reverse   | R2R4         | CTGGTAGCCCCCAACAAGGACAA               | 812      |
| Reverse   | <b>R2K4</b>  | TGAGTGGTAGCCACCRACAA                  | 818      |
| Reverse   | <b>R2-6</b>  | TTTCTGGTTGTCAGACTGGTAG                | 828      |
| Reverse   | R2-14        | CAGTAGCCCGTTTCTGATTCATCTTCTTCATCATCTT | 1214     |
| Reverse   | <b>R2-16</b> | GACCCAGGTGTTAATGTC                    | 1279     |
| Reverse   | R2R1         | CTGTTGAATAGAAAGGCACCCAGGT             | 1288     |
| Reverse   | R2R5         | GATCCATGCACTGTGCATGAACCCA             | 1360     |

Locations of 3' primer nucleotides are given relative to GenBank Accession #M58531 (1). The names of primers used most extensively are highlighted in bold.

1. Carlson, L.M., Oettinger, M.A., Schatz, D.G., Masteller, E.L., Hurley, E.A., McCormack, W.T., Baltimore, D., & Thompson, C.B. (1991) *Cell* **64**, 201-208.
