# Supplementary material
Source: PubMed Central journal article supplement (PMC503738)
Supplement: pnas_101_30_11040__8.pdf [file pnas_101_30_11040__8.pdf]

**Table 7.** Taxonomy and distribution of passerines

| Suborder | Infraorder            | Parvorder             | Coded Group                                 | Australasia, New Zealand,<br>South Pacific Islands | Eurasia<br>and Africa | New World |
|----------|-----------------------|-----------------------|---------------------------------------------|----------------------------------------------------|-----------------------|-----------|
| Tyranni  | Acanthisittides       |                       | Acanthisittidae                             | 1                                                  | 0                     | 0         |
| Tyranni  | Eurylaimides          | Pittoidea             | Pittidae                                    | 1                                                  | 1                     | 0         |
| Tyranni  | Eurylaimides          | Eurylaimoidea         | <i>Smithornis</i>                           | 0                                                  | 1                     | 0         |
| Tyranni  | Eurylaimides          | Eurylaimoidea         | Other Eurylaimidae                          | 0                                                  | 1                     | 0         |
| Tyranni  | Eurylaimides          | Eurylaimoidea         | Philepittidae                               | 0                                                  | 1                     | 0         |
| Tyranni  | <i>incertae sedis</i> |                       | <i>Sapayoa</i>                              | 0                                                  | 0                     | 1         |
| Tyranni  | Tyrannides            |                       | Tyrannides                                  | 0                                                  | 0                     | 1         |
| Passeri  |                       | Corvida               | Climacteridae                               | 1                                                  | 0                     | 0         |
| Passeri  |                       | Corvida               | Menuridae                                   | 1                                                  | 0                     | 0         |
| Passeri  |                       | Corvida               | Ptilonorhynchidae                           | 1                                                  | 0                     | 0         |
| Passeri  |                       | Corvida               | Maluridae                                   | 1                                                  | 0                     | 0         |
| Passeri  |                       | Corvida               | Meliphagidae                                | 1                                                  | 1                     | 0         |
| Passeri  |                       | Corvida               | Pardalotidae                                | 1                                                  | 1                     | 0         |
| Passeri  |                       | Corvida               | Petroicidae                                 | 1                                                  | 0                     | 0         |
| Passeri  |                       | Corvida               | Irenidae                                    | 0                                                  | 1                     | 0         |
| Passeri  |                       | Corvida               | Orthonychidae                               | 1                                                  | 0                     | 0         |
| Passeri  |                       | Corvida               | Pomatostomidae                              | 1                                                  | 0                     | 0         |
| Passeri  |                       | Corvida               | Laniidae                                    | 1                                                  | 1                     | 1         |
| Passeri  |                       | Corvida               | Vireonidae and <i>Yuhina zantholeuca</i>    | 0                                                  | 1                     | 1         |
| Passeri  |                       | Corvida               | Cinclosomatinae                             | 1                                                  | 1                     | 0         |
| Passeri  |                       | Corvida               | Corcoracinae                                | 1                                                  | 0                     | 0         |
| Passeri  |                       | Corvida               | Neosittini                                  | 1                                                  | 0                     | 0         |
| Passeri  |                       | Corvida               | Mohouini                                    | 1                                                  | 0                     | 0         |
| Passeri  |                       | Corvida               | <i>Falcunculus</i>                          | 1                                                  | 0                     | 0         |
| Passeri  |                       | Corvida               | <i>Rhagologus</i>                           | 1                                                  | 0                     | 0         |
| Passeri  |                       | Corvida               | Pachycephalini (part)                       | 1                                                  | 1                     | 0         |
| Passeri  |                       | Corvida               | <i>Pitohui</i> and <i>Oreoica</i>           | 1                                                  | 0                     | 0         |
| Passeri  |                       | Corvida               | <i>Eulacestoma</i>                          | 1                                                  | 0                     | 0         |
| Passeri  |                       | Corvida               | <i>Turnagra</i>                             | 1                                                  | 0                     | 0         |
| Passeri  |                       | Corvida               | Corvini                                     | 1                                                  | 1                     | 1         |
| Passeri  |                       | Corvida               | <i>Melampitta</i>                           | 1                                                  | 0                     | 0         |
| Passeri  |                       | Corvida               | <i>Cnemophilus</i> and <i>Loboparadisea</i> | 1                                                  | 0                     | 0         |
| Passeri  |                       | Corvida               | Paradisaeini (part)                         | 1                                                  | 0                     | 0         |
| Passeri  |                       | Corvida               | Artamini                                    | 1                                                  | 1                     | 0         |
| Passeri  |                       | Corvida               | <i>Oriolus</i>                              | 1                                                  | 1                     | 0         |
| Passeri  |                       | Corvida               | <i>Sphecotheres</i>                         | 1                                                  | 0                     | 0         |
| Passeri  |                       | Corvida               | Campephagidae                               | 1                                                  | 1                     | 0         |
| Passeri  |                       | Corvida               | Rhipidurini                                 | 1                                                  | 1                     | 0         |
| Passeri  |                       | Corvida               | <i>Chaetorhynchus</i>                       | 1                                                  | 0                     | 0         |
| Passeri  |                       | Corvida               | <i>Dicrurus</i>                             | 1                                                  | 1                     | 0         |
| Passeri  |                       | Corvida               | Monarchini (part)                           | 1                                                  | 1                     | 0         |
| Passeri  |                       | Corvida               | Aegithininae and Malaconotinae              | 0                                                  | 1                     | 0         |
| Passeri  |                       | Corvida               | Callaeatidae                                | 1                                                  | 0                     | 0         |
| Passeri  |                       | <i>incertae sedis</i> | Picathartidae                               | 0                                                  | 1                     | 0         |
| Passeri  |                       | Passerida             | Bombycillidae                               | 0                                                  | 1                     | 1         |
| Passeri  |                       | Passerida             | Cinclidae                                   | 0                                                  | 1                     | 1         |
| Passeri  |                       | Passerida             | Turdinae                                    | 1                                                  | 1                     | 1         |
| Passeri  |                       | Passerida             | Muscicapinae (part)                         | 1                                                  | 1                     | 1         |
| Passeri  |                       | Passerida             | Sturnini                                    | 1                                                  | 1                     | 0         |
| Passeri  |                       | Passerida             | Mimini                                      | 0                                                  | 0                     | 1         |
| Passeri  |                       | Passerida             | Sittidae+Certhiidae                         | 0                                                  | 1                     | 1         |
| Passeri  |                       | Passerida             | Paridae                                     | 1                                                  | 1                     | 1         |
| Passeri  |                       | Passerida             | <i>Culicicapa</i> and <i>Elminia</i>        | 1                                                  | 1                     | 0         |
| Passeri  |                       | Passerida             | Aegithalidae                                | 0                                                  | 1                     | 1         |
| Passeri  |                       | Passerida             | Hirundinidae                                | 1                                                  | 1                     | 1         |
| Passeri  |                       | Passerida             | Regulidae                                   | 0                                                  | 1                     | 1         |
| Passeri  |                       | Passerida             | Pycnonotidae                                | 1                                                  | 1                     | 0         |
| Passeri  |                       | Passerida             | <i>Hypocoliidae</i>                         | 0                                                  | 1                     | 0         |
| Passeri  |                       | Passerida             | Cisticolidae                                | 1                                                  | 1                     | 0         |
| Passeri  |                       | Passerida             | Zosteropidae and Sylviidae (part)           | 1                                                  | 1                     | 1         |
| Passeri  |                       | Passerida             | <i>Arcanator</i> and <i>Modulatrix</i>      | 0                                                  | 1                     | 0         |
| Passeri  |                       | Passerida             | Alaudidae                                   | 1                                                  | 1                     | 1         |
| Passeri  |                       | Passerida             | Promeropinae                                | 0                                                  | 1                     | 0         |
| Passeri  |                       | Passerida             | Nectariniinae                               | 1                                                  | 1                     | 0         |
| Passeri  |                       | Passerida             | Melanocharitidae                            | 1                                                  | 0                     | 0         |
| Passeri  |                       | Passerida             | Paramythiidae                               | 1                                                  | 0                     | 0         |
| Passeri  |                       | Passerida             | Passerinae                                  | 0                                                  | 1                     | 0         |
| Passeri  |                       | Passerida             | Motacillinae                                | 1                                                  | 1                     | 1         |
| Passeri  |                       | Passerida             | Prunellinae                                 | 0                                                  | 1                     | 0         |
| Passeri  |                       | Passerida             | Ploceinae+Estrildinae                       | 1                                                  | 1                     | 0         |
| Passeri  |                       | Passerida             | Fringillidae                                | 1                                                  | 1                     | 1         |

Taxonomy follows Sibley and Monroe (1). Distributions are drawn from Sibley and Monroe (1) and a variety of regional sources. Entries under "Coded Group" indicate higher taxa, which were coded for biogeographic analysis (see *Methods*). Highlighted taxa are unsampled taxa with uncertain relationships (in most cases due to non-monophyly of other sampled members of the same group). These taxa have been excluded from analysis (see *Methods*).

1. Sibley, C.G. & Monroe, B.L., Jr. (1990) *Distribution and Taxonomy of the Birds of the World* (Yale Univ. Press, New Haven, CT)
