# Supplementary material
Source: PubMed Central journal article supplement (PMC503738)

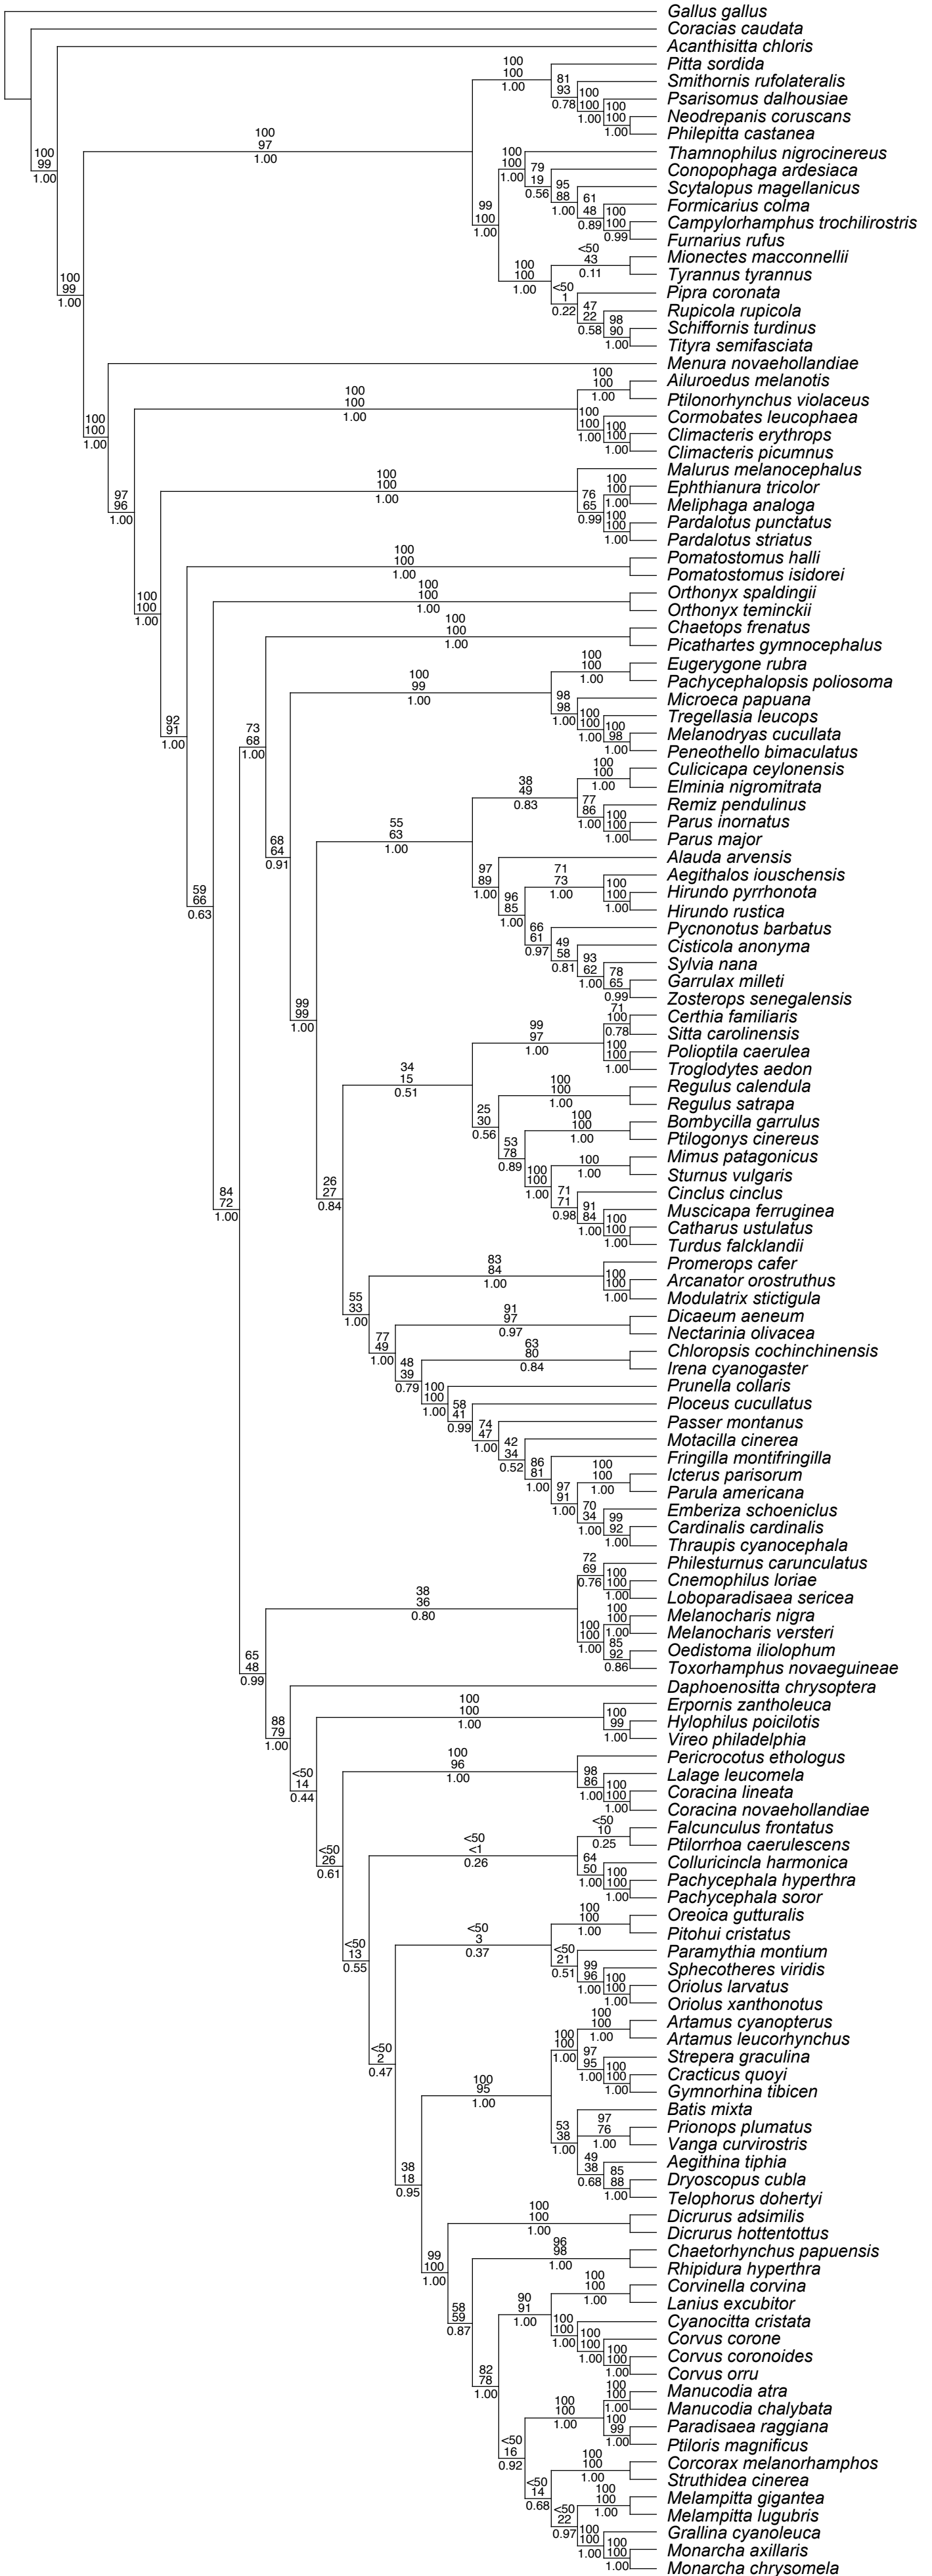

Supplement: pnas_101_30_11040__2.pdf [file pnas_101_30_11040__2.pdf]

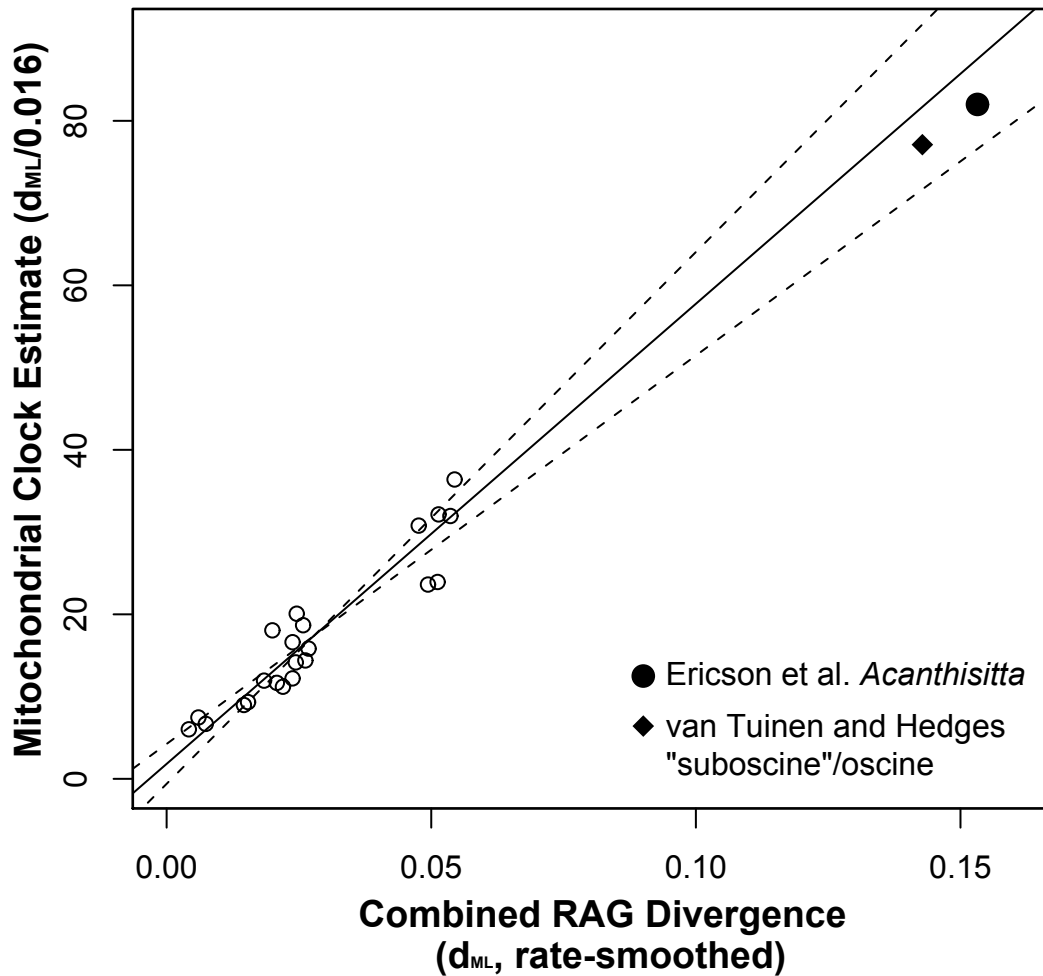

Supplement: pnas_101_30_11040__3.pdf [file pnas_101_30_11040__3.pdf]
